1 **Title: Basic and effective reproduction numbers of COVID-19 cases in South Korea**  
2 **excluding Sincheonji cases**

3

4 **Authors:** Jeongeun Hwang<sup>1</sup>, Hyunjung Park<sup>2</sup>, Jiwon Jung<sup>3,4</sup>, Sung-Han Kim<sup>3,4</sup>, Namkug Kim<sup>5</sup>,

5 \*

6 **Affiliations:**

7 <sup>1</sup>Department of Medicine, University of Ulsan College of Medicine, Asan Medical Center,  
8 Seoul, Republic of Korea

9 <sup>2</sup>Asan Institute for Life Sciences, Asan Medical Center, Seoul, Republic of Korea

10 <sup>3</sup>Department of Infectious Diseases, Asan Medical Center, University of Ulsan College of  
11 Medicine, Seoul, Republic of Korea

12 <sup>4</sup>Office for Infection Control, Asan Medical Center, Seoul, Republic of Korea

13 <sup>5</sup>Department of Convergence Medicine, Asan Medical Center, University of Ulsan College of  
14 Medicine, Asan Medical Center, Seoul, Republic of Korea, 05505

15 \* Corresponding author

16

17 **Address for Correspondence:**

18 Namkug Kim, PhD

19 Department of Convergence Medicine, Asan Medical Center, 88, Olympic-ro 43-gil, Sonpa-  
20 gu, Seoul, 05505, Republic of Korea

21 E-mail: [namkugkim@gmail.com](mailto:namkugkim@gmail.com)

22

23 **Funding:**

24 Not applicable

25

26 **Abstract**

27 In February and March 2020, COVID-19 epidemic in South Korea met a large black swan  
28 effect by a Sincheonji cult mass infection in Daegu-Gyeongbuk area. The black swan made  
29 it difficult to evaluate that the current policies for infection prevention including social  
30 distancing, closing schools, hand washing, and wearing masks good enough or not.  
31 Therefore, in this study, we evaluated basic reproduction number ( $R_0$ ) and time-dependent  
32 reproduction number ( $R_t$ ) of confirmed cases based on various kinds of populations,  
33 including total, Daegu-Gyeongsangbuk-do, except-Daegu-Gyeongbuk, Sincheonji, and except-  
34 Sincheonji. In total, it seems the infection is going to be under control, but this is never true  
35 because in the except-Sincheonji and except-Daegu-Gyeongbuk cases,  $R_0$  is still above 1.0,  
36 and  $R_t$  is drifting around 1.0. This study could be used to determine government policies in  
37 the near future.

38

39 **Keywords:** COVID-19

40

41 **Text**

42 South Korea currently has 9,241 cumulated confirmed COVID-19 cases as of March 26<sup>th</sup>,  
43 2020. There was a large “black swan” event called the Sincheonji cult mass infection  
44 incidence that lead to an exponential increase of confirmed cases. Since then, a great effort  
45 has been made to defend the public from virus, and to some extent, these efforts have  
46 suppressed the spread.

47 The basic and time-dependent effective reproduction number  $R_0$  and  $R_t$  are two of the most  
48 representative characteristics for the dynamics of the infectious virus. To observe the basic  
49 features of the COVID-19 outbreak in South Korea without the black swan effect, we  
50 collected the daily counts of confirmed cases. The Korean Centers for Disease Control and  
51 Prevention (KCDC) has investigated, summarized, and released daily updates on the  
52 cumulated counts of confirmed cases, which are available online<sup>1</sup>. The cumulated counts  
53 have been provided in total, according to the administrative provinces (Gwangyeok-Si and  
54 Do in the South Korean administrative system), and several mass infection cases have  
55 occurred. We collected counts of daily confirmed cases from the Sincheonji cult, which was  
56 named after a church with a COVID-19 outbreak, and subtracted them from the total counts  
57 to comprise the “except Sincheonji” cases. Additionally, we collected the case counts from  
58 Daegu-si and Gyeongsangbuk-do province, which surrounds Daegu-si, because the initial  
59 outbreak in the Sincheonji cult took place in those areas. We summed up the counts from  
60 the two provinces and subtracted them from the total counts to total the “except Daegu-  
61 Gyeonbuk” cases. The Sincheonji cult cases and Daegu-Gyeongbuk cases are not mutually  
62 inclusive nor exclusive. Because it took days to identify a confirmed case belonging to the  
63 Sincheonji cult, the time frames of the Sincheonji cases could have been confounded.

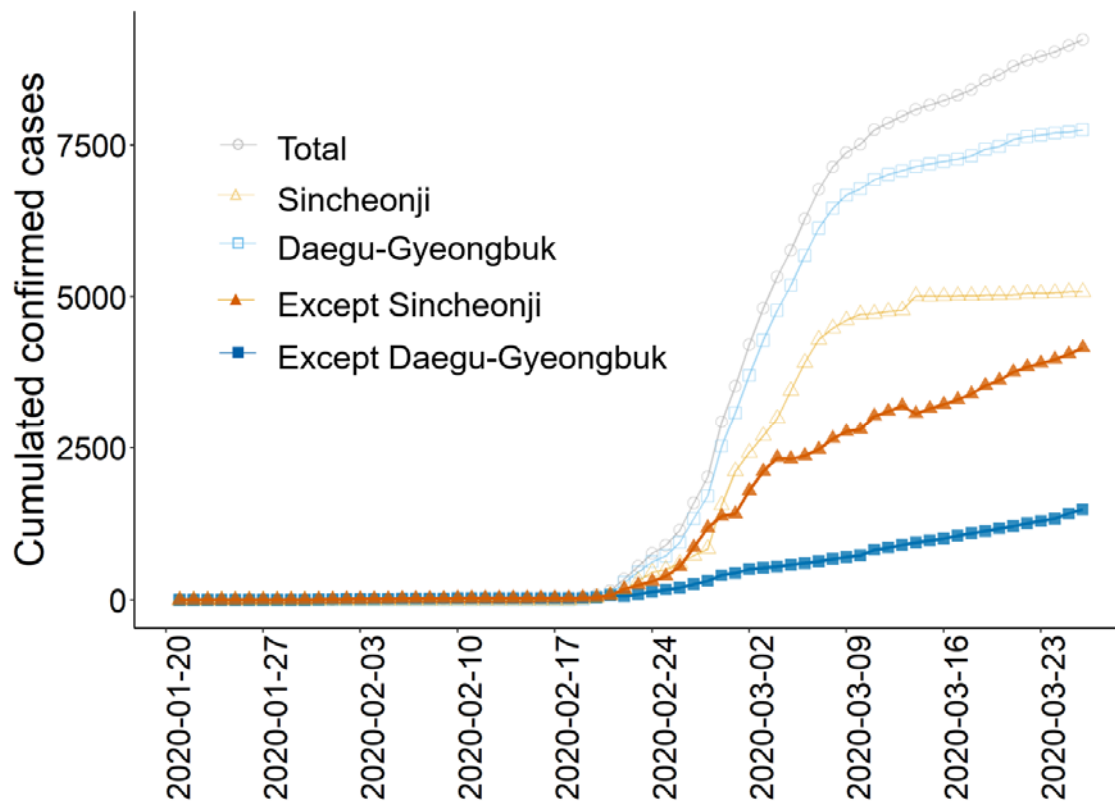

64

65 **Figure 1.** Cumulated counts of confirmed cases of the subgroups, including the total,  
66 Daegu-Gyeoengbuk, except-Daegu-Gyeongbuk, Sincheonji, and except-Sincheonji cases.

67

68 The cumulated counts from January 21<sup>st</sup>, 2020 (the first confirmed case of COVID-19 in  
69 South Korea) to March 26<sup>th</sup>, 2020 are shown in Figure 1. The first Sincheonji cult case  
70 appeared on February 18<sup>th</sup>, 2020, and it was the first case in the Daegu-Gyeongbuk area.  
71 Qualitatively, the cumulated counts curves for Daegu-Gyeongbuk and Sincheonji looks like  
72 they are reaching for a plateau, but the curves for the except-Sincheonji and except-Daegu-  
73 Gyeongbuk cases do not.

74 R statistics software version 3.6.3 (R Foundation for Statistical Computing, Vienna, Austria)  
75 and the R0 package<sup>2</sup> was used. For the estimation of the subgroups'  $R_0$  values, we fitted an  
76 exponential growth model<sup>3</sup>. Sensitivity analysis of the exponential growth period was

77 performed. The generation time distribution should be obtained from the time lag between all  
78 infector–infectee pairs<sup>4</sup>, which is called a serial interval, but it is currently unavailable.  
79 Instead, we assumed that the serial interval had a gamma distribution with mean  $\pm$  standard  
80 deviation of  $2.0 \pm 1.0$ ,  $3.0 \pm 1.5$ ,  $4.0 \pm 2.0$ ,  $5.0 \pm 2.5$ , and  $6.0 \pm 3.0$  days. The serial interval  
81 could be approximated by referring to the estimated incubation time of COVID-19. Recent  
82 research by Guan et al.<sup>5</sup> suggested that the virus has an incubation period of four days with  
83 an interquartile range two to seven days. Some studies have estimated a wider range for the  
84 incubation period; data for human infection with other coronaviruses (e.g. MERS-CoV,  
85 SARS-CoV) suggested that the incubation period may range from two to 14 days<sup>6</sup>.  
86 Sensitivity tests for the generation time assumptions were performed (Figure S1).

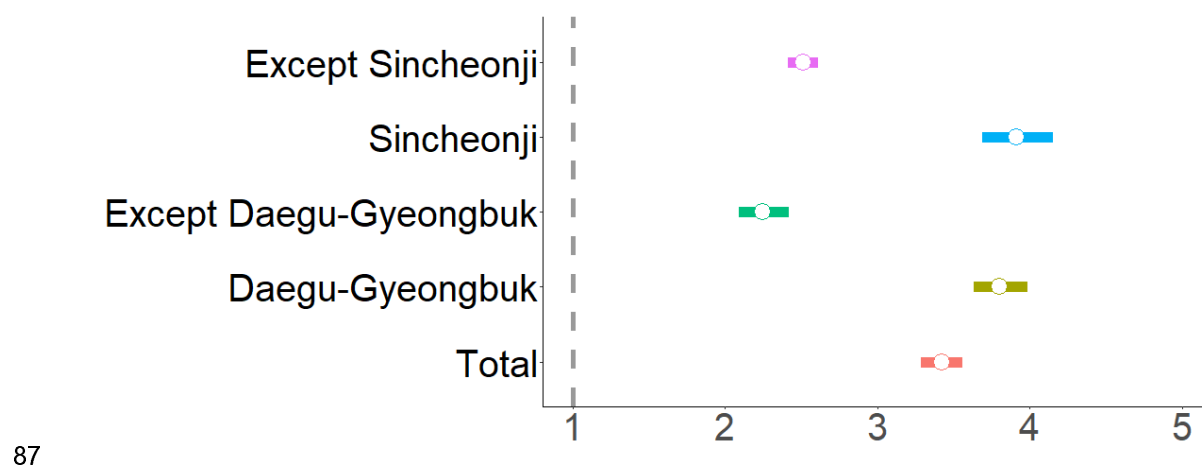

87  
88 **Figure 2.**  $R_0$  with 95% confidence intervals in the subgroups, including the total, Daegu-  
89 Gyeongbuk, except Daegu-Gyeongbuk, Sincheonji, and except Sincheonji groups.

90

91 Figure 2 shows the estimated  $R_0$  for each study subgroup and their 95% confidence  
92 intervals (by simulation) with an assumption of  $4.0 \pm 2.0$  (mean  $\pm$  standard deviation). In the  
93 sensitivity test, the  $R_0$  values were sensitive to the generation time assumptions; therefore,  
94 the numbers themselves are not reliable in the current study. On the contrary, the relative  
95 scales among the  $R_0$  values were robust to the generation time assumptions.

96 The Daegu-Gyeongbuk cases showed significantly higher  $R_0$  than the except-Daegu-  
97 Gyeongbuk cases, and the Sincheonji cases showed significantly higher  $R_0$  than the except-  
98 Sincheonji cases. In all subgroups,  $R_0$  was larger than 1.0.  $R_0$  is an initial-stage  
99 characteristic before the health authorities take action or social awareness rises. Since the  
100 Sincheonji cult mass infection incidence was noticed, health authority actions including  
101 COVID-19 tests, isolation, active surveillance, and school closures, were executed  
102 immediately. In addition, social awareness of COVID-19 soared, and South Korean residents  
103 began to more actively follow hygiene recommendations, including wearing masks, washing  
104 hands frequently, and practicing social distancing in everyday life, throughout the nation.  
105 Adding to such efforts to fight the disease, we measured the time dependent reproduction  
106 rate  $R_t$ <sup>7</sup> for each subgroup. We again assumed the generation time to gamma distribution  
107 with a  $4.0 \pm 2.0$  mean  $\pm$  standard deviation.

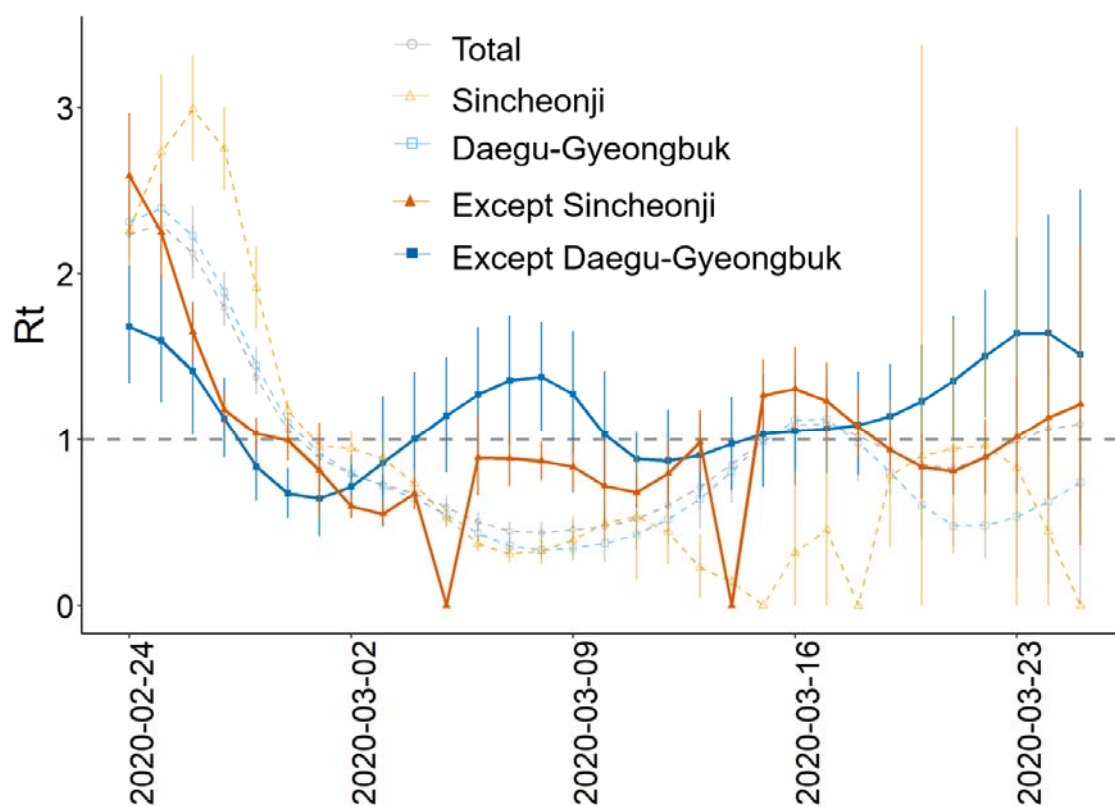

109 **Figure 3.** Changes of  $R_t$  with 95% confidence intervals of subgroups, including the total,  
110 Sincheonji, except-Sincheonji, Daegu-Gyeongbuk, and except-Daegu-Gyeongbuk groups. A  
111 week after the first Sincheonji cult mass infection case (February 24<sup>th</sup>, 2020),  $R_t$  for all  
112 subgroups decreased for a couple of days. In the following weeks (around March 2<sup>nd</sup>, 2020  
113 and after) Sincheonji and Daegu-Gyeongbuk cases fell under the  $R_t = 1.0$  horizon, but  $R_t$  for  
114 the except-Sincheonji and except-Daegu-Gyeongbuk cases were drifting around the 1.0  
115 horizon.

116

117 In Figure 3,  $R_t$  with 95% confidence intervals in the subgroups, including the total, Sincheonji,  
118 except-Sincheonji, Daegu-Gyeongbuk, and except-Daegu-Gyeongbuk subgroups, are  
119 shown. In all subgroups,  $R_t$  gradually decreased until the end of February.  $R_t$  for the  
120 Sincheonji and Daegu-Gyeongbuk cases are staying under  $R_t = 1.0$  horizon, but in the  
121 except-Sincheonji and except-Daegu-Gyeongbuk cases,  $R_t$  is drifting around the  $R_t = 1.0$   
122 horizon currently (as of March 26<sup>th</sup>, 2020).

123 Although the analysis in Figure 3 is preliminary, and thus, we should be very cautious about  
124 its interpretations, we see a great uncertainty that South Korea is still in danger of COVID-19.  
125 Another instance of the mass infection case could happen if we lose the current momentum  
126 in social distancing and preventive action, even if no black swan comes. Assessing only the  
127 total counts may blind our sense of danger. Therefore, analyzing the except-Sincheonji and  
128 except-Daegu-Gyeongbuk cases separately from the total cases would be recommended.  
129 We are releasing the  $R_t$  estimates' daily updates for various regional subgroups of South  
130 Korea online; <http://covid19.mi2rl.co/>

131 Our current analysis has substantial limitations. Because we collected the daily press  
132 releases from the KCDC, there could be re-classified cases not reflected in our analysis.  
133 There could also be misclassification, because a Sincheonji cult may deny his or her beliefs

134 in the KCDC investigations. Imported cases were not accounted for in the current analysis,  
135 though the cumulated imported cases until March 17<sup>th</sup>, 2020 was 54, according to KCDC  
136 press release. Another source of confounding is that we are not aware of the true number of  
137 cases. In a recent study in China, Li et al.<sup>8</sup> estimated that only 14% of infected cases have  
138 been confirmed by the authorities. Nevertheless, qualitative interpretations may stay robust  
139 to under-reporting if they are constant. Delays in confirmation and in classification are  
140 another source of error. The uncertainty in the generation time is also an issue, but it could  
141 be overcome by performing sensitivity analysis. If more detailed data on infector–infectee  
142 interactions becomes available, more reliable analysis could be achieved.

143 To conclude, in total, it seems that the virus is going to be under control, but this is never true  
144 because if we analyze the except-Sincheonji and except-Daegu-Geyongbuk cases, the basic  
145 reproduction rate is still above 1.0, and the effective reproduction rate  $R_t$  is still higher than  
146 1.0. The current efforts to suppress the COVID-19 outbreak should at least be maintained.

147

#### 148 **Disclosure**

149 All authors have no potential conflicts of interest to disclose.

150

#### 151 **Author Contributions**

152 Conceptualization: Hwang J, Kim S, Jung J, Kim N. Methodology: Hwang J, Kim N.  
153 Formal analysis: Hwang J, Kim N. Data curation: Par H, Software: Hwang J, Kim N.  
154 Investigation: Jung J, Kim S, Kim N. Writing – original draft preparation: Hwang J, Park  
155 H. Writing – review and editing: Jung J, Kim S, Kim N. Approval of final manuscript: all  
156 authors.

157



158 **ORCID**

159 Jeongeun Hwang: <http://orcid.org/0000-0002-5821-5405>

160 Hyunjung Park: <https://orcid.org/0000-0002-7177-9862>

161 Jiwon Jung: <http://orcid.org/0000-0003-4333-3270>

162 Sung-Han Kim: <http://orcid.org/0000-0002-6596-8253>

163 Namkug Kim: <http://orcid.org/0000-0002-3438-2217>

164

165 **REFERENCES**

- 166 1. KCDC. Korean Centers for Disease Control and Prevention <http://cdc.go.kr>2020.
- 167 2. Obadia T, Haneef R, Boelle PY. The R0 package: a toolbox to estimate reproduction  
168 numbers for epidemic outbreaks. *Bmc Medical Informatics and Decision Making* 2012;12.
- 169 3. Wallinga J, Lipsitch M. How generation intervals shape the relationship between  
170 growth rates and reproductive numbers. *Proceedings of the Royal Society B-Biological*  
171 *Sciences* 2007;274(1609):599-604.
- 172 4. Svensson A. A note on generation times in epidemic models. *Mathematical*  
173 *Biosciences* 2007;208(1):300-11.
- 174 5. Guan WJ, Ni ZY, Hu Y, Liang WH, Ou CQ, He JX, et al. Clinical Characteristics of  
175 Coronavirus Disease 2019 in China. *N Engl J Med* 2020.
- 176 6. CDC. Interim Clinical Guidance for Management of Patients with Confirmed  
177 Coronavirus Disease (COVID-19). [https://www.cdc.gov/coronavirus/2019-ncov/hcp/clinical-](https://www.cdc.gov/coronavirus/2019-ncov/hcp/clinical-guidance-management-patients.html)  
178 [guidance-management-patients.html](https://www.cdc.gov/coronavirus/2019-ncov/hcp/clinical-guidance-management-patients.html). Updated March 7, 20202020.
- 179 7. Wallinga J, Teunis P. Different epidemic curves for severe acute respiratory  
180 syndrome reveal similar impacts of control measures. *American Journal of Epidemiology*

181 2004;160(6):509-16.

182 8. Li R, Pei S, Chen B, Song Y, Zhang T, Yang W, et al. Substantial undocumented  
183 infection facilitates the rapid dissemination of novel coronavirus (SARS-CoV2). Science  
184 2020.

185

Cumulated confirmed cases

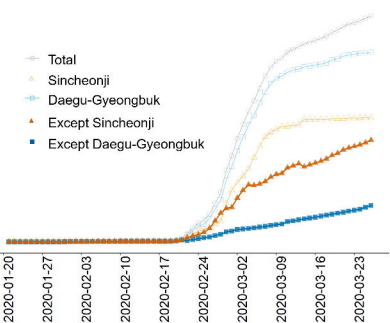

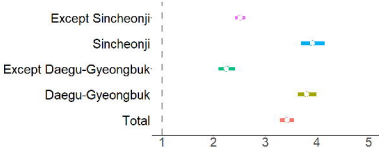

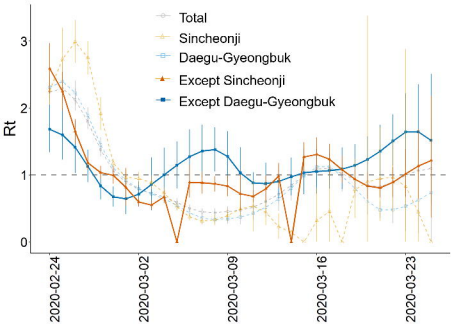

Source: https://medrxiv.org/content/10.1101/2020.03.19.20039347v2.full.pdf
